# Supplementary material
Source: HighWire-hosted journal article supplement (https://jech.bmj.com/content/75/2/197)
Supplement: inline-supplementary-material-1 [file inline-supplementary-material-1.pdf]

Supplementary file 3 Basic characteristics of articles included on the association of obesity in relation to UFs risk

| Author (ref.)<br>year | Country       | Study design    | Study period                       | Study population                                                  | Age of Participants, years                             | NO. of participants (case, %) | Assessment methods of UFs                    | Assessment methods and categories of obesity                                                                                                                                                                                                                | OR (95% CI) for each category of obesity                                                                                                                                                                                                                                                                                                                                                         | Adjustment for covariates                                                                                                                                                                 | Quality assessment |
|-----------------------|---------------|-----------------|------------------------------------|-------------------------------------------------------------------|--------------------------------------------------------|-------------------------------|----------------------------------------------|-------------------------------------------------------------------------------------------------------------------------------------------------------------------------------------------------------------------------------------------------------------|--------------------------------------------------------------------------------------------------------------------------------------------------------------------------------------------------------------------------------------------------------------------------------------------------------------------------------------------------------------------------------------------------|-------------------------------------------------------------------------------------------------------------------------------------------------------------------------------------------|--------------------|
| Faerstein (12), 2001  | United States | Case-Control    | Between January 1990 and June 1993 | White and African-American                                        | Cases: 20-55 (42.3±6.4)<br>Controls: 18-53, (39.8±6.0) | 712 (318, 44.7%)              | Histologic findings or uterine sonogram      | BMI: 16.2-20.3, 20.4-22.3, 22.4-25.3, 25.4-48.8                                                                                                                                                                                                             | BMI: 1.0 (ref), 1.3 (0.8-2.1), 1.3 (0.8-2.1), 2.3 (1.4-3.8)                                                                                                                                                                                                                                                                                                                                      | Age, clinic, and ethnicity                                                                                                                                                                | 8                  |
| Terry (13), 2007      | United States | Cohort          | 1989-2001                          | White and African American                                        | 25-42                                                  | 116609 (8446, 7.2%)           | Ultrasound or hysterectomy                   | BMI: <20, 20-21.9, 22-23.9, 24-24.9, 25-26.9, 27-29.9, ≥30<br>Weight change since age 18(kg): lost ≥5, lost 3-4.9, stable, gained 3-4.9, gained 5-9.9, gained 10-14.9, gained 15-19.9, gained ≥20<br>Waist-to-hip ratio: <0.70, 0.70-0.79, 0.80-0.89, >0.89 | BMI: 0.94 (0.86-1.03), 1.00 (ref), 1.01 (0.94-1.08), 1.10 (1.00-1.20), 1.07 (0.99-1.17), 1.17 (1.08-1.27), 1.14 (1.05-1.22)<br>Weight change since age 18 (kg): 1.10 (0.96-1.26), 0.97 (0.82-1.14), 1.00 (ref), 1.15 (1.05-1.26), 1.14 (1.05-1.23), 1.25 (1.15-1.35), 1.25 (1.14-1.37), 1.31 (1.22-1.42)<br>Waist-to-hip ratio: 0.95 (0.85-1.05), 1.00 (ref), 1.13 (1.02-1.25), 1.06 (0.96-1.18) | Age, age at menarche, infertility, married, ancestry, parity and age at first birth, time since last birth, age at first oral contraceptive use, smoking status, diastolic blood pressure | 8                  |
| Sarkodie (14), 2016   | Ghana         | Cross-sectional | November 2011 to February 2012     | Ghanaian                                                          | 14-54 (31.9±7.9)                                       | 244 (90, 36.9%)               | Ultrasound                                   | BMI: <25, 25-29.9, ≥30                                                                                                                                                                                                                                      | BMI: 1.00 (ref), 1.316 (0.635-2.727), 3.535 (1.813- 6.895)                                                                                                                                                                                                                                                                                                                                       | NA                                                                                                                                                                                        | 5                  |
| He (15), 2013         | China         | Case-Control    | From October 2009 to April 2011    | Chinese                                                           | >18                                                    | 164 (32, 19.5%)               | Ultrasound diagnosis or hysterectomy surgery | BMI: <18.5, 18.5-23.9, 24.0-27.9, ≥28                                                                                                                                                                                                                       | BMI: 1.2 (1.0,1.4)                                                                                                                                                                                                                                                                                                                                                                               | Age, gravidity and parity                                                                                                                                                                 | 5                  |
| Martin (16), 2011     | United States | Cross-sectional | 2003-2004                          | Non-Hispanic white, non-Hispanic black, Mexican American/Hispanic | 20-49                                                  | 887 (68, 7.7%)                | Self-reported                                | BMI:<18.5,18.5-24.9, 25-29.9, ≥30                                                                                                                                                                                                                           | BMI: 1.12 (0.12-10.77), 1.00 (ref), 1.35 (0.54-3.42), 2.31 (1.15-4.62)                                                                                                                                                                                                                                                                                                                           | NA                                                                                                                                                                                        | 5                  |
| Takeda (17), 2008     | Japan         | Case-control    | Between 1997 and 2005              | Japanese                                                          | 40- 49 (median 45)                                     | 372 (213, 57.3%)              | Histologically confirmed                     | BMI:<24, ≥24                                                                                                                                                                                                                                                | BMI: 2.20 (1.25-3.86)                                                                                                                                                                                                                                                                                                                                                                            | NA                                                                                                                                                                                        | 6                  |

|                       |               |                 |                                      |         |                   |                     |                                                  |                                                                                                                                                                                                                                                                             |                                                                                                                                                                                                                                                                                                                                                                                                                                                                                |                                                                                                                                                                                                                                                                     |   |
|-----------------------|---------------|-----------------|--------------------------------------|---------|-------------------|---------------------|--------------------------------------------------|-----------------------------------------------------------------------------------------------------------------------------------------------------------------------------------------------------------------------------------------------------------------------------|--------------------------------------------------------------------------------------------------------------------------------------------------------------------------------------------------------------------------------------------------------------------------------------------------------------------------------------------------------------------------------------------------------------------------------------------------------------------------------|---------------------------------------------------------------------------------------------------------------------------------------------------------------------------------------------------------------------------------------------------------------------|---|
| Tak (18), 2016        | Korea         | Case-control    | Between March 2012 and February 2014 | Korean  | 40-47 (median 44) | 1230 (615, 50.0%)   | Ultrasonography                                  | Central obesity: waist circumference $\geq 85$ cm                                                                                                                                                                                                                           | Waist circumference (cm): 1.14 (0.93-1.41)                                                                                                                                                                                                                                                                                                                                                                                                                                     | Age, age at first birth, menarche age, parity, use of oral contraceptives or intrauterine devices, and health-related habits                                                                                                                                        | 8 |
| Lumbiganon (19), 1996 | Thailand      | Case-control    | From January 1991 to June 1993       | Thai    | <60               | 3619 (910, 25.1%)   | Surgery and pathologically proven diagnosis      | BMI: $\leq 24$ , 25-29, $\geq 30$                                                                                                                                                                                                                                           | BMI: 1.06 (1.04-1.08)                                                                                                                                                                                                                                                                                                                                                                                                                                                          | Depot-medroxyprogesterone acetate, oral contraceptives, tubal ligation, family history of uterine leiomyomas, parity, education, smoking, abortions                                                                                                                 | 7 |
| Wise (20), 2005       | United States | Cohort          | From 1997 through 2001               | Black   | 21-69             | 21506 (2146, 10.0%) | Ultrasound and/or hysterectomy                   | BMI: <20, 20.0-22.4, 22.5-24.9, 25.0-27.4, 27.5-29.9, 30.0-32.4, >32.5<br>Weight gain since age 18 (kg): <5, 5-9, 10-14, 15-24, >25<br>Waist-to-hip ratio: <0.71, 0.71-0.75, 0.76-0.79, 0.80-0.85, >0.86<br>Waist circumference (inch): <27, 27-29, 30-32, 33-35, $\geq 36$ | BMI: 1.00 (ref), 1.34 (1.02-1.75), 1.39 (1.07-1.81), 1.45 (1.12-1.89), 1.47 (1.11-1.93), 1.36 (1.02-1.80), and 1.21 (0.93-1.58)<br>Weight gain since age 18 (kg): 1.0 (ref), 1.10 (0.93-1.30), 1.13 (0.97-1.33), 1.18 (1.01-1.36), 1.10 (0.95-1.29)<br>Waist-to-hip ratio: 1.0 (ref), 1.07 (0.92-1.25), 1.11 (0.95-1.30), 1.12 (0.95-1.31), 0.98 (0.83-1.16)<br>Waist circumference (inch): 1.00 (ref), 1.08 (0.92-1.28), 1.01 (0.84-1.21), 1.16 (0.94-1.43), 0.97 (0.77-1.21) | Age, time period, age at menarche, parity, age at first birth, years since last birth, ever use of oral contraceptives, education, living in the West, current alcohol consumption, and smoking. Models of waist-to-hip ratio measures are further adjusted for BMI | 8 |
| Parazzini (21), 2006  | Italy         | Cross-sectional | Between 1997 and 2003                | Italian | Mean 53           | 85967 (2239, 2.6%)  | Clinical diagnosis or ultrasonographic diagnosis | BMI: $\leq 22$ , 22-26, $\geq 26$                                                                                                                                                                                                                                           | BMI for clinical diagnosis: 1.00 (ref), 1.07 (0.90-1.27), 1.30 (1.09-1.55)<br>BMI for ultrasonographic diagnosis: 1.00 (ref), 1.06 (0.87-1.30), 1.29 (1.01-1.45)                                                                                                                                                                                                                                                                                                               | Age, calendar period at interview, geographic area, level of education, marital status, smoking habits, menopausal status, parity, miscarriage and oral contraceptive use.                                                                                          | 7 |
| Yang (22), 2014       | China         | Case-control    | From 2009 to 2012                    | Chinese | 35-55             | 826 (316, 38.3%)    | Ultrasound or hysterectomy                       | BMI: $\leq 21.3$ , >21.3-23.0, >23.0-24.4, >24.4-26.5, >26.5<br>waist-to-hip ratio: $\leq 0.79$ , >0.79-0.83, >0.83-0.86, >0.86-0.90, >0.90<br>Waist circumference(cm): $\leq 74.0$ , >74.0-79.0, >79.0-83.2, >83.2-90.0, >90.0                                             | BMI: 1.00 (ref), 1.44 (0.90-2.33), 1.76 (1.09-2.82), 1.78 (1.11-2.85), 1.76 (1.08-2.86)<br>waist-to-hip ratio: 1.0 (ref), 1.03 (0.63-1.67), 1.45 (0.90-2.35), 1.43 (0.89-2.30), 1.32 (0.80-2.17)                                                                                                                                                                                                                                                                               | Age, parity, age at menarche, and age at last birth                                                                                                                                                                                                                 | 7 |

|                      |               |                 |                                |                            |       |                                                               |                                          |                                                                                                                                                                                       |                                                                                                                                                                                   |                                                                                                                                                                                                                                                                                                                                                                                                                               |   |
|----------------------|---------------|-----------------|--------------------------------|----------------------------|-------|---------------------------------------------------------------|------------------------------------------|---------------------------------------------------------------------------------------------------------------------------------------------------------------------------------------|-----------------------------------------------------------------------------------------------------------------------------------------------------------------------------------|-------------------------------------------------------------------------------------------------------------------------------------------------------------------------------------------------------------------------------------------------------------------------------------------------------------------------------------------------------------------------------------------------------------------------------|---|
|                      |               |                 |                                |                            |       |                                                               |                                          |                                                                                                                                                                                       | Waist circumference (cm): 1.00 (ref), 1.16 (0.72-1.85), 1.46 (0.91-2.35), 1.63 (1.03-2.59), 1.55 (0.95-2.53)                                                                      |                                                                                                                                                                                                                                                                                                                                                                                                                               |   |
| Templeman (23), 2009 | United States | Cohort          | 1995-2006                      | Californian                | 25-84 | 80204 (1790, 2.2%)                                            | Surgically confirmed                     | BMI:<18.50, 18.50-24.99, 25.00-29.99, ≥30.00<br>Change in weight since age 18 years (kg): same weight or weight loss, weight gain <10.00, weight gain 10.00-19.99, weight gain >20.00 | BMI: 1.00 (0.74-1.35), 1.0 (ref), 1.23 (1.10-1.38), 1.27 (1.11-1.46)<br>Change in weight since age 18 years (kg): 0.87 (0.76-1.01), 1.0 (ref), 1.16 (1.02-1.31), 1.23 (1.08-1.41) | BMI: menopausal hormone status, age at first full-term pregnancy, race/ethnicity, mother or sister had fibroids, daily alcohol intake, ever had difficulty becoming pregnant, cigarette smoker, diabetes, high blood pressure, ever had tubal ligation, age at menarche and stratified by age<br>Change in weight since age 18 years (kg): race/ethnicity, family history of fibroids, stratified by age, BMI at age 18 years | 8 |
| Chen (24), 2001      | United States | Case-control    | During 1978-1979 and 1985-1987 | White and African-American | 17-44 | White: 1234 (246, 19.9%)<br>African-American: 350 (70, 20%)   | Surgical report, self-report             | BMI: normal,<27.3; obese:≥27.3                                                                                                                                                        | White: 1.0 (ref), 1.1 (0.7-1.6)<br>African-American: 1.0 (ref), 1.0 (0.5-2.0)                                                                                                     | Age at sterilization, number of living children, and cigarette smoking                                                                                                                                                                                                                                                                                                                                                        | 8 |
| Baird (25),2007      | United States | Cross-sectional | 1996-1999                      | White and African-American | 35-49 | White: 455 (207, 45.5%)<br>African-American: 734 (166, 22.6%) | Ultrasound, surgical report, self-report | BMI: <25, 25-29.99, 30-34.99, ≥35                                                                                                                                                     | African-American: 1.00 (ref), 1.36 (0.86-2.17), 1.60 (0.94-2.71), 1.56 (0.94-2.59);<br>White: 1.00 (ref), 0.95 (0.59- 1.53), 1.07 (0.53-2.15), 0.94 (0.45-1.98)                   | Age, age at menarche, parity after age 24 years, physical activity                                                                                                                                                                                                                                                                                                                                                            | 8 |

|                       |               |                 |                                     |                                  |                                              |                   |                          |                                                                                                                                          |                                                                                                                                                                                                                |                                                                                                                                                                                                                                                                                  |   |
|-----------------------|---------------|-----------------|-------------------------------------|----------------------------------|----------------------------------------------|-------------------|--------------------------|------------------------------------------------------------------------------------------------------------------------------------------|----------------------------------------------------------------------------------------------------------------------------------------------------------------------------------------------------------------|----------------------------------------------------------------------------------------------------------------------------------------------------------------------------------------------------------------------------------------------------------------------------------|---|
| Sato (26), 1998       | Japan         | Case-Control    | From September 1994 to October 1995 | Japanese                         | 29-54 (median 45)                            | 300 (100, 33.3%)  | Pathologically diagnosed | BMI: <20.0, 20.0-24.0, <24.0-26.4<br>Waist-to-hip ratio: <0.75, 0.75-0.80, 0.80-0.85, ≥0.85                                              | BMI: 1.00 (ref), 0.97 (0.45-2.08), 0.99 (0.38-2.57)<br>Waist-to-hip ratio: 1.00 (ref), 3.21 (1.59-6.51), 10.02 (4.57-21.98), 12.80 (4.50-36.37)                                                                | NA                                                                                                                                                                                                                                                                               | 7 |
| Lee (27), 2018        | Korea         | Cohort          | Began in July 2013                  | Korean                           | 20-45 (median 35.5)                          | 5062 (210, 4.1%)  | Physician or myomectomy  | BMI: <18.5, 18.5-<23, 23-<25, 25-<27.5, ≥27.5<br>Weight change since age 18 (kg): Lost ≥2, stable, gained 2-<5, Gained 5-<10, gained ≥10 | BMI: 0.62 (0.32-1.20), 1.00 (ref), 1.03 (0.71-1.50), 1.23 (0.77-1.99), 1.22 (0.63-2.36)<br>Weight change since age 18 (kg): 1.21 (0.70-2.07), 1.00 (ref), 1.55 (1.01-2.38), 1.84 (1.22-2.76), 2.00 (1.25-3.20) | Age, alcohol, education, number of pregnancy                                                                                                                                                                                                                                     | 7 |
| Haan (28), 2018       | Suriname      | Cross-sectional | Between February 2013 and July 2015 | African, Asian, or other races   | Fibroids: 51.1 ±9.1; no fibroids: 41.6 ±13.6 | 728 (104, 14.3%)  | Self-reported            | Obesity: BMI ≥27.5 for Asians, ≥30.0 for other ancestries                                                                                | BMI: 1.10 (0.68-1.75)                                                                                                                                                                                          | Age, African ancestry, use of hormonal contraceptives, parity, postmenopausal status, fasting plasma total cholesterol (except for hypercholesterolemia model), fasting plasma glucose (except for diabetes model), and systolic blood pressure (except for hypertension model). | 7 |
| Ciavattini (29), 2017 | Italy         | Case-Control    | From January 2014 to December 2014  | Italian                          | 16-39                                        | 216 (71, 32.9%)   | Ultrasound               | BMI: continuous variable                                                                                                                 | BMI: 0.97 (0.90-1.04)                                                                                                                                                                                          | NA                                                                                                                                                                                                                                                                               | 6 |
| Samadi (30), 1996     | United States | Case-Control    | Between 1978 and 1982               | African American and other races | 20-54                                        | 1698 (200, 11.8%) | Self-reported            | BMI: lean or heavy dichotomized at the median value                                                                                      | BMI: 1.0 (ref), 1.0 (0.7-1.5)                                                                                                                                                                                  | Menopausal status, frequency of pap smears, age at menarche, education, breast-feeding, race, smoking, and oral contraceptive use.                                                                                                                                               | 8 |
| Parazzini (31), 2004  | Italy         | Case-control    | 1986-1997                           | Italian                          | 21-54 (median 43)                            | 2400 (843, 35.1%) | Histologically confirmed | Severe overweight: BMI ≥30                                                                                                               | BMI: 0.6 (0.5-0.8)                                                                                                                                                                                             | Age, education, smoking, parity and calendar year at interview                                                                                                                                                                                                                   | 8 |

|                    |       |              |                               |         |                                                                     |                  |                                                                                                                                  |                                                                                                                                                                               |                                                                                                                                                                                                                                                                                                     |     |   |
|--------------------|-------|--------------|-------------------------------|---------|---------------------------------------------------------------------|------------------|----------------------------------------------------------------------------------------------------------------------------------|-------------------------------------------------------------------------------------------------------------------------------------------------------------------------------|-----------------------------------------------------------------------------------------------------------------------------------------------------------------------------------------------------------------------------------------------------------------------------------------------------|-----|---|
| Sun (32), 2019     | China | Case-control | From April 2016 to April 2018 | Chinese | Cases: 18-65 (44.22 ± 7.19)<br>Controls: 32.00-50.50 (median 44.00) | 170 (89, 52.4%)  | Medical history, clinical manifestations, gynecological physical examination, ultrasound examination and postoperative pathology | BMI: <22.08, 22.08-24.15, 24.16-26.73, >26.73<br>Waist-to-hip ratio: <0.84, 0.84-0.87, 0.88-0.92, >0.92<br>Waist circumference (cm): <77.25, 77.25-82.09, 82.10-89.93, >89.93 | BMI: 1.00 (ref), 1.499 (0.606-3.707), 2.564 (1.006-6.533), 5.167 (1.904-14.023)<br>Waist-to-hip ratio: 1.00 (ref), 3.993 (1.434, 11.119), 7.494 (2.755, 20.390), 20.357 (6.275, 66.045)<br>Waist circumference (cm): 1.00 (ref), 2.273 (0.887, 5.821), 4.877 (1.843, 12.911), 9.344 (3.185, 27.411) | Age | 6 |
| Sharami (33), 2019 | Iran  | Case-control | From March 2018 to March 2019 | Iranian | Cases: 42.62 ± 6.22<br>Controls: 38.00 ± 8.02                       | 212 (104, 49.1%) | Abdominal or transvaginal sonography                                                                                             | BMI: <25, 25-30, 30-35, >35                                                                                                                                                   | BMI: 1.00 (ref), 1.839 (0.898-3.770), 1.368 (0.625- 2.998), 1.665 (0.611-4.535)                                                                                                                                                                                                                     | NA  | 6 |

Ref.: reference; OR: odds ratio; CI: confidence interval; BMI: body mass index; NA: not available; UFs: uterine fibroids.
