# Supplementary material
Source: HighWire-hosted journal article supplement (https://jech.bmj.com/content/75/2/197)
Supplement: inline-supplementary-material-3 [file inline-supplementary-material-3.pdf]

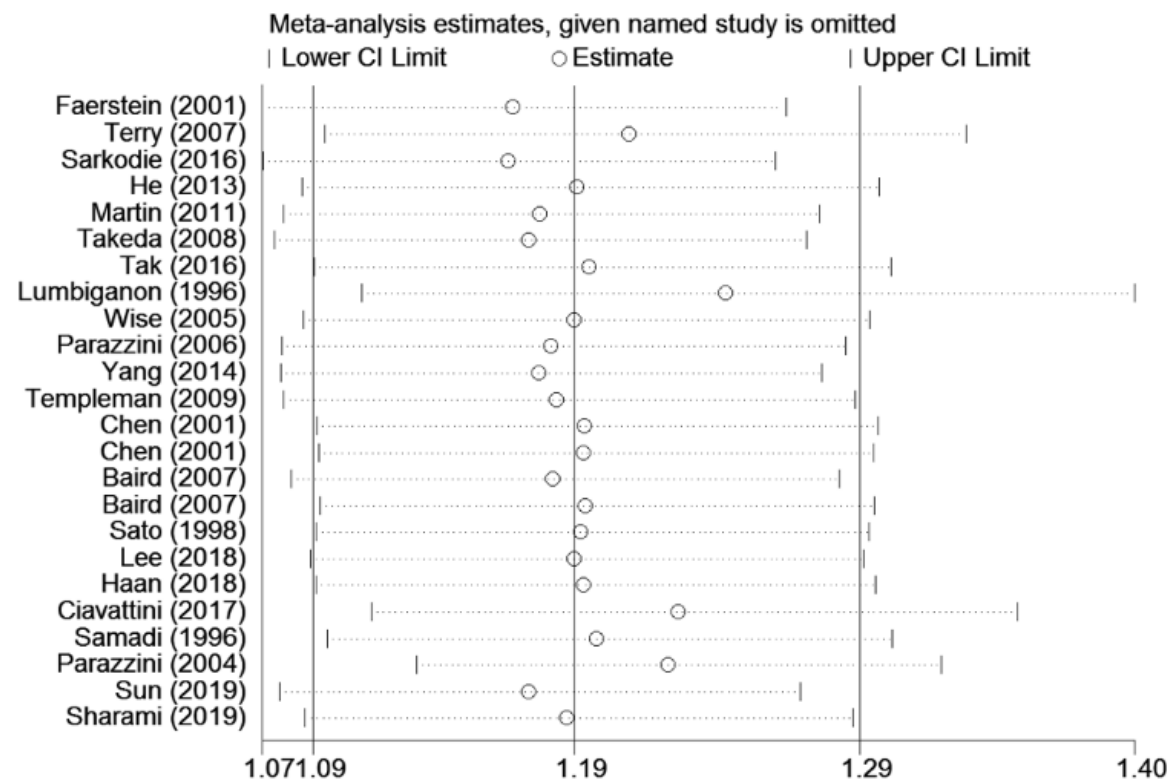

Supplementary file 1 Sensitivity analysis excluding one study at a time. The middle line represents the pooled effect value. The bilateral lines represent 95% confidence interval.
