# Supplementary material
Source: HighWire-hosted journal article supplement (https://jech.bmj.com/content/75/2/197)

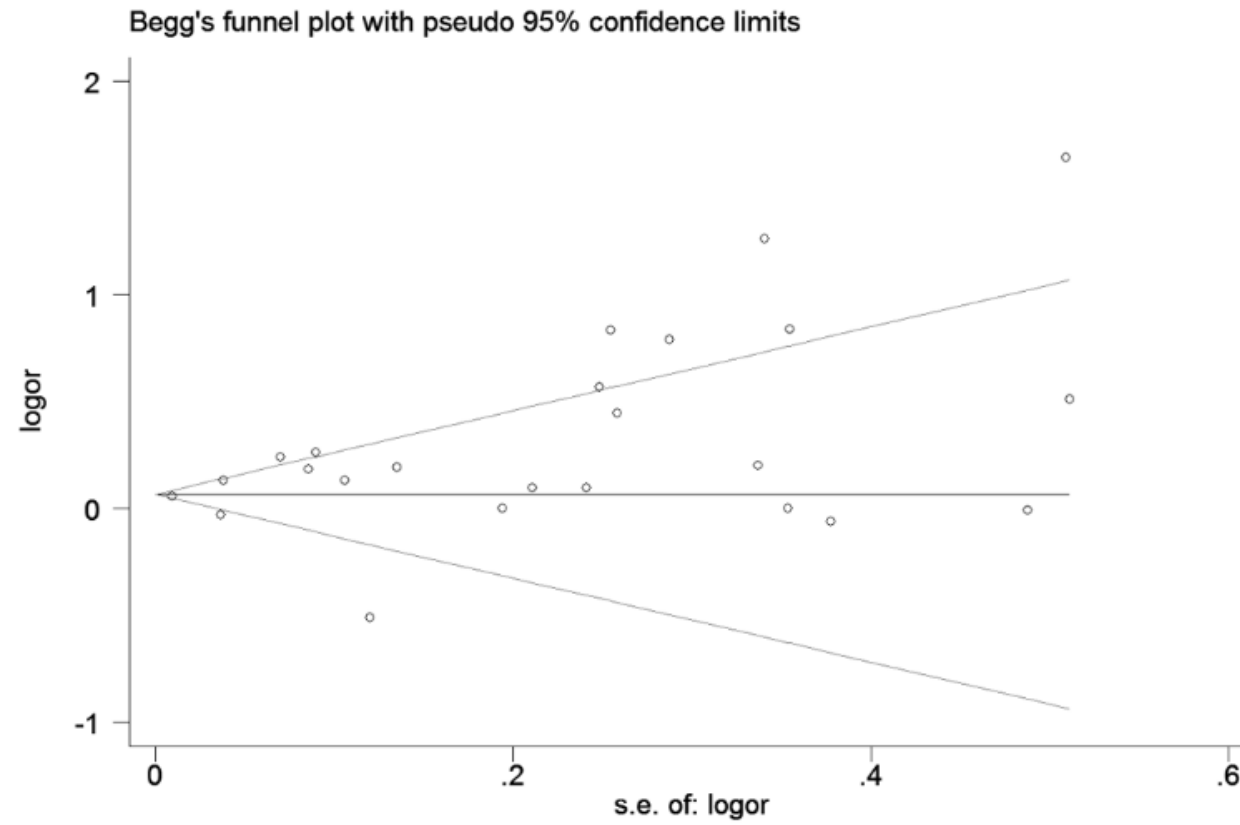

Supplementary file 2 Funnel plots for included studies. Each dot represents a different study.

Supplement: inline-supplementary-material-2 [file inline-supplementary-material-2.pdf]
